# Supplementary material for: Systematic evaluation of the effect of polyadenylation signal variants on the expression of disease-associated genes
Source: HighWire-hosted journal article supplement (doi:10.1101/gr.270256.120), 2021-04-19
Supplement: Supplemental_Fig_3.docx [file Supplemental_Fig_3.docx]

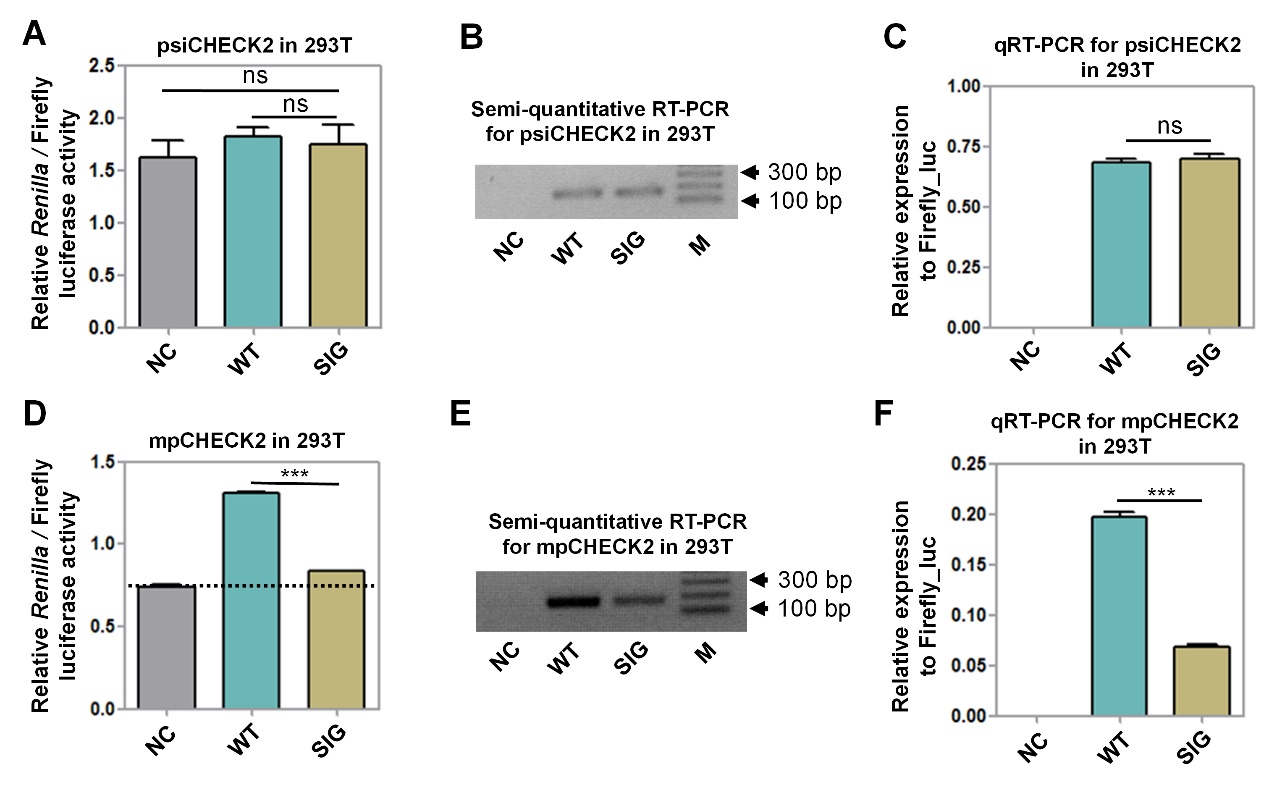


Supplemental Fig S3:The causality of disease-associated variants in the PAS of the *HBA2* gene can be reliably validated by the mpCHECK2 vector based on both luciferase activity and RT-PCR. (a) Comparison of *Renilla* luciferase activity (normalized by firefly) using the psiCHECK2 reporter vector in 293T cells with negative control (NC), tested 3′ UTR with wild-type PAS (insertion of 3′ UTR of *HBA2* with WT PAS, labeled WT) and tested 3′ UTR with PAS fully mutated (insertion of 3′ UTR of *HBA2* with AATAAA changed to GGATCC, labeled SIG). (**b)-(c)** Comparison of mRNA expression levels of NC, WT, and SIG using both semi-quantitative PCR (**b**) and qRT-PCR (**c**). The qRT-PCR of forward (F) and reverse (R) primer pair design (see the top of **Fig. 4b**). M denotes molecular markers indicating size (bp) of RT-PCR products. (**d)** Comparison of normalized *Renilla* luciferase activity using mpCHECK2 vector (see **Fig. 4e)** in 293T cells with NC, WT, and SIG. Dashed line indicates the basal luciferase signal of NC. (**e)-(f)** Comparison of mRNA expression levels among NC, WT, and SIG (based on mpCHECK2) using both semi-quantitative PCR (**e**) and qRT-PCR (**f**). All luciferase activity assays were performed with four replicates and all qRT-PCR reactions were carried out with three replicates. Data presents as the mean ± SEM. ***, P < 0.001; **, P < 0.01; ns, not significant; one-way ANOVA test.
