# Supplementary material for: Systematic evaluation of the effect of polyadenylation signal variants on the expression of disease-associated genes
Source: HighWire-hosted journal article supplement (doi:10.1101/gr.270256.120), 2021-04-19
Supplement: Supplemental_Fig_4.docx [file Supplemental_Fig_4.docx]

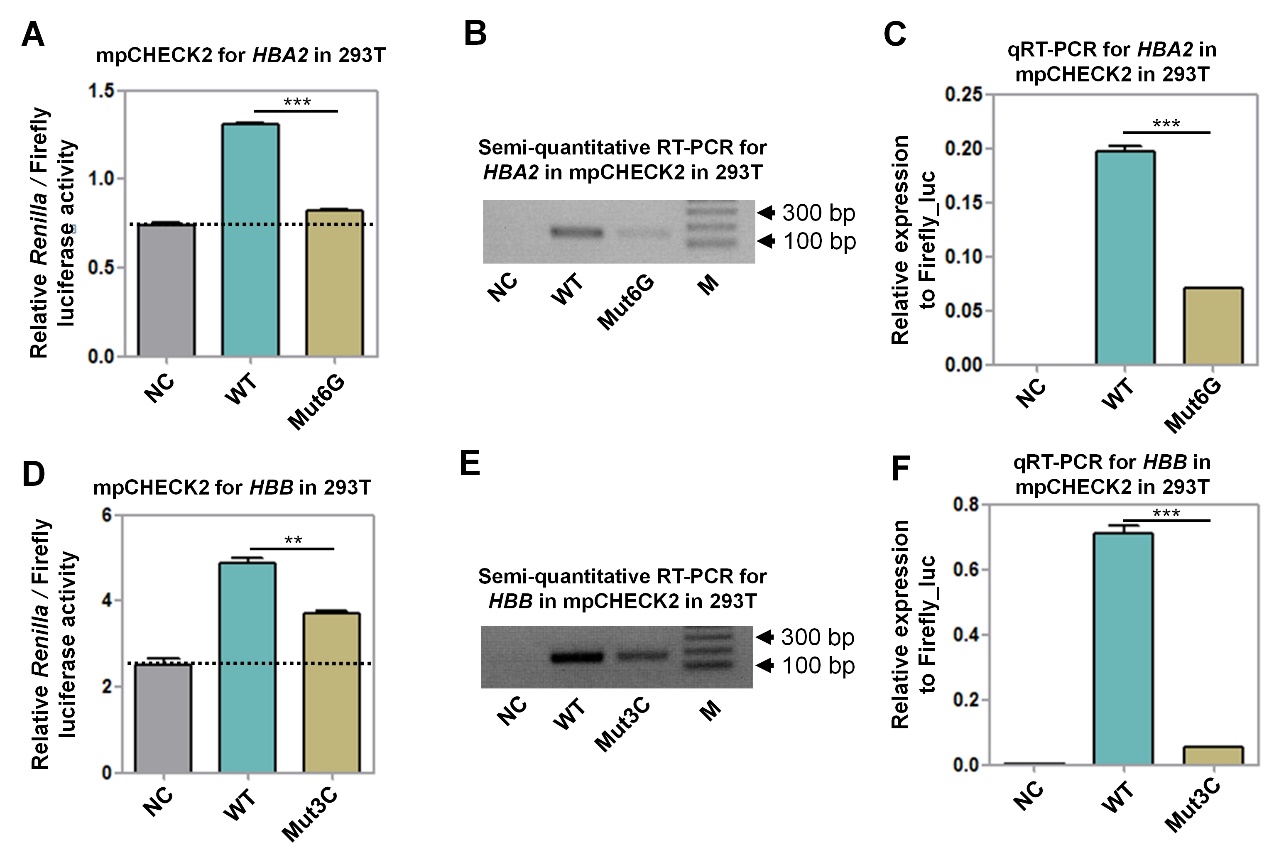


Supplemental Fig S4: Evaluation of disease-associated variants in the PAS of *HBA2* and *HBB* genes using the mpCHECK2 vector based on both luciferase activity and RT-PCR. (a) Comparison of normalized *Renilla* luciferase activity using mpCHECK2 vector in 293T cells with NC, WT, and Mut6G (see **Fig. 5a**). Dashed line indicates the basal luciferase signal of NC. (**b)-(c)** Comparison of mRNA expression level among NC, WT, and Mut6G using both semi-quantitative PCR (**b**) and qRT-PCR (**c**). (**d)** Comparison of normalized *Renilla* luciferase activity using mpCHECK2 vector in 293T cells with NC, WT, and Mut3C (see **Fig. 5e**). Dashed line indicates the basal luciferase signal of NC. (**e)-(f)** Comparison of mRNA expression level with NC, WT, and Mut3C using both semi-quantitative PCR (**e**) and qRT-PCR (**f**). All luciferase activity assays were performed with four replicates and all qRT-PCR reactions were carried out with three replicates. Data presents as the mean ± SEM. ***, P < 0.001; **, P < 0.01; ns, not significant; one-way ANOVA test.
