# Supplementary material for: Systematic evaluation of the effect of polyadenylation signal variants on the expression of disease-associated genes
Source: HighWire-hosted journal article supplement (doi:10.1101/gr.270256.120), 2021-04-19
Supplement: Supplemental_Fig_5.docx [file Supplemental_Fig_5.docx]

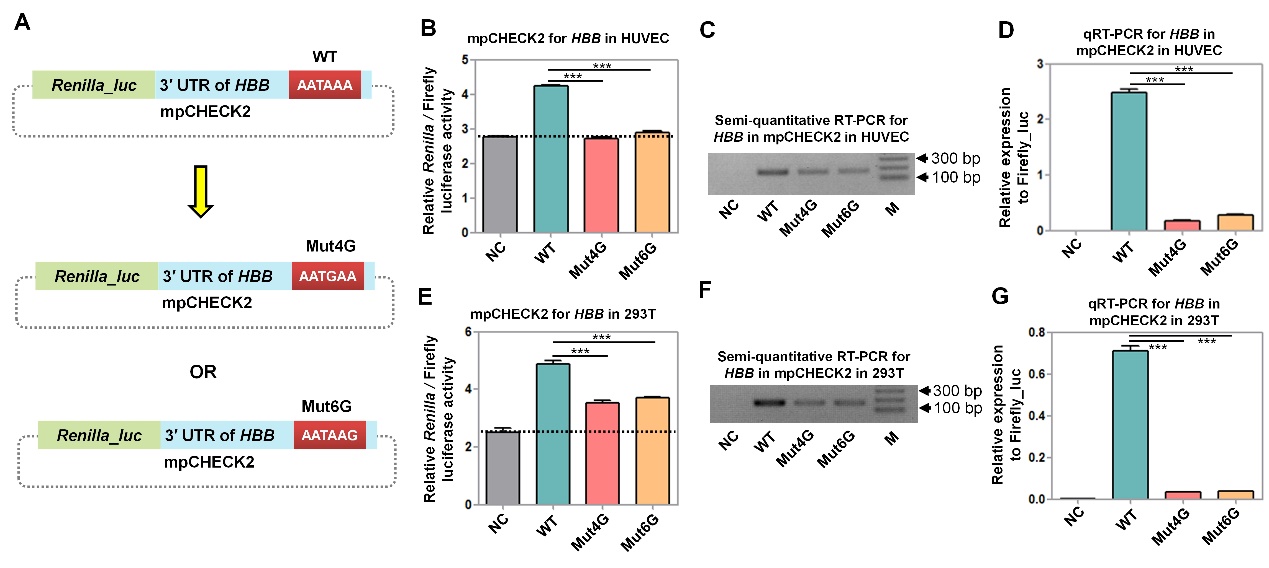


Supplemental Fig S5: Evaluation of different disease-associated variants in the PAS of the *HBB* gene using the mpCHECK2 vector based on both luciferase activity and RT-PCR in HUVEC and 293T cells. (a)The schematic diagram showing that the 4th and 6th position of the PAS in *HBB* were both changed from T (labeled WT) to G (labeled Mut4G and Mut6G) in the mpCHECK2 vector. (**b)** Comparison of normalized *Renilla* luciferase activity using the mpCHECK2 vector in HUVEC cells with NC, WT, Mut4G, and Mut6G [panel (**a)**]. Dashed line indicates the basal luciferase signal of NC. (**c)-(d)** Comparison of mRNA expression levels of NC, WT, Mut4G, and Mut6G that were transfected into HUVEC cells using both semi-quantitative PCR (**c**) and qRT-PCR (**d**). (**e)** Comparison of normalized *Renilla* luciferase activity using mpCHECK2 vector in 293T cells with NC, WT, Mut4G, and Mut6G. Dashed line indicates the basal luciferase signal of NC. (**f)-(g)** Comparison of mRNA expression levels among NC, WT, Mut4G, and Mut6G that were transfected into 293T cells using both semi-quantitative PCR (**f**) and qRT-PCR (**g**). All luciferase activity assays were performed with four replicates and all qRT-PCR reactions were carried out with three replicates. Data presents as the mean ± SEM. ***, P < 0.001; **, P < 0.01; ns, not significant; one-way ANOVA test.
