# Supplementary material for: Systematic evaluation of the effect of polyadenylation signal variants on the expression of disease-associated genes
Source: HighWire-hosted journal article supplement (doi:10.1101/gr.270256.120), 2021-04-19
Supplement: Supplemental_Fig_6.docx [file Supplemental_Fig_6.docx]

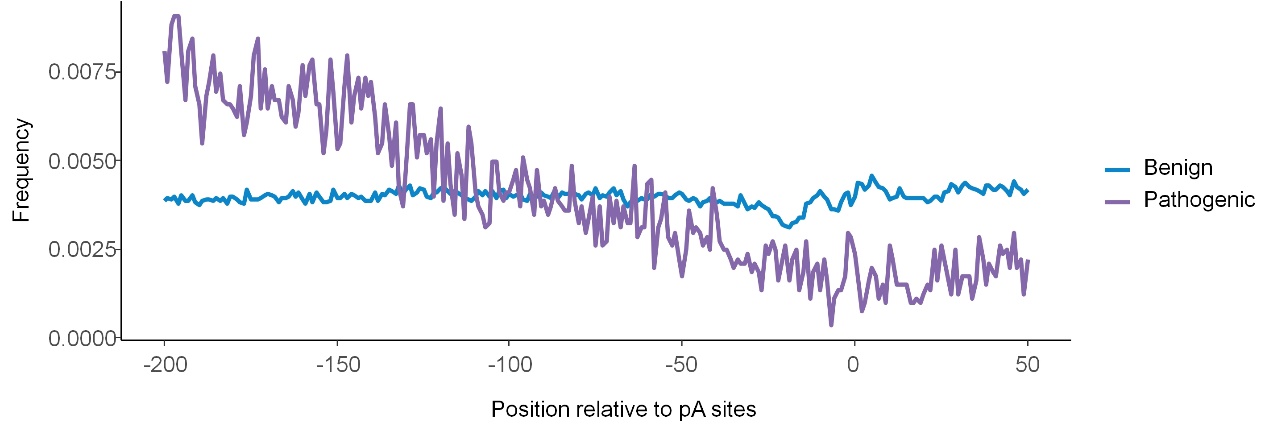


Supplemental Fig S6: Relative distribution frequency of either pathogenic (Patho) or benign variants around the poly A site. Position 0 on the X axis is the poly A site. A negative number denotes upstream distance (nt) from the polyA site.
