# Supplementary material for: Systematic evaluation of the effect of polyadenylation signal variants on the expression of disease-associated genes
Source: HighWire-hosted journal article supplement (doi:10.1101/gr.270256.120), 2021-04-19
Supplement: Supplemental_Fig_8.docx [file Supplemental_Fig_8.docx]

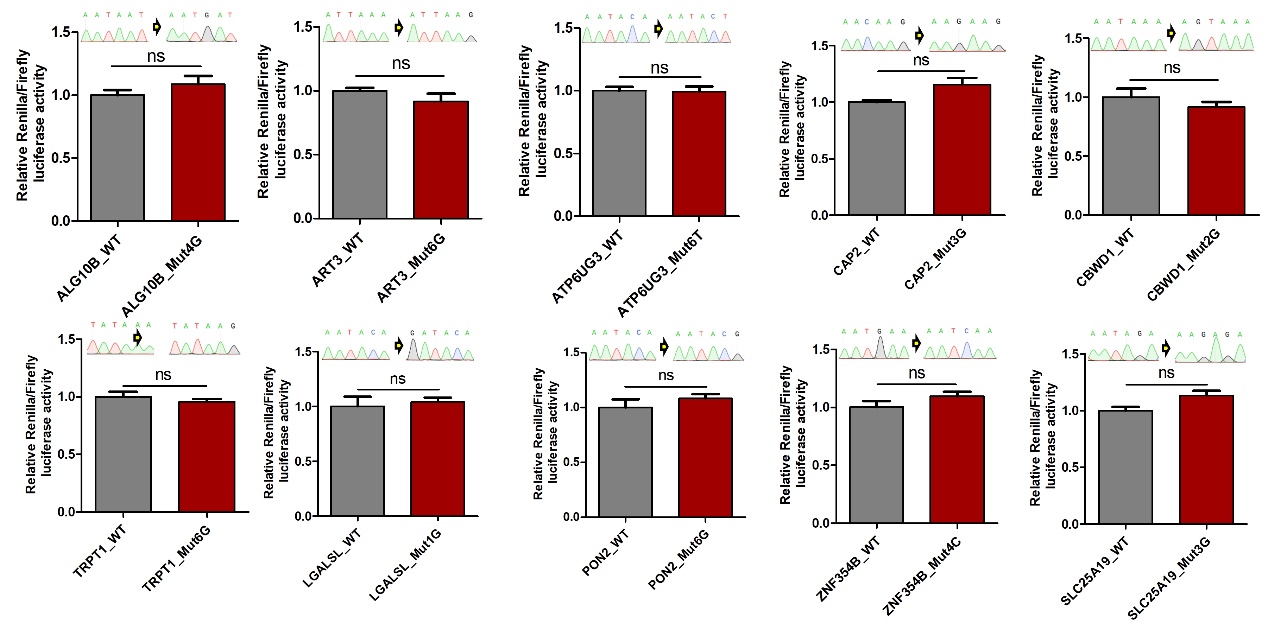


Supplemental Fig S8: Comparison of normalized *Renilla* luciferase activity in 293T cells transfected with mpCHECK2 of WT or database-annotated benign PAS variants. The numbers and capital letters represent the mutated position of PAS and the bases after mutation, respectively. Each mutation was confirmed by Sanger sequencing, as shown on the top of each bar plot. ns: not significant, one-way ANOVA test.
