# Supplementary material for: Systematic evaluation of the effect of polyadenylation signal variants on the expression of disease-associated genes
Source: HighWire-hosted journal article supplement (doi:10.1101/gr.270256.120), 2021-04-19
Supplement: Supplemental_Fig_9.docx [file Supplemental_Fig_9.docx]

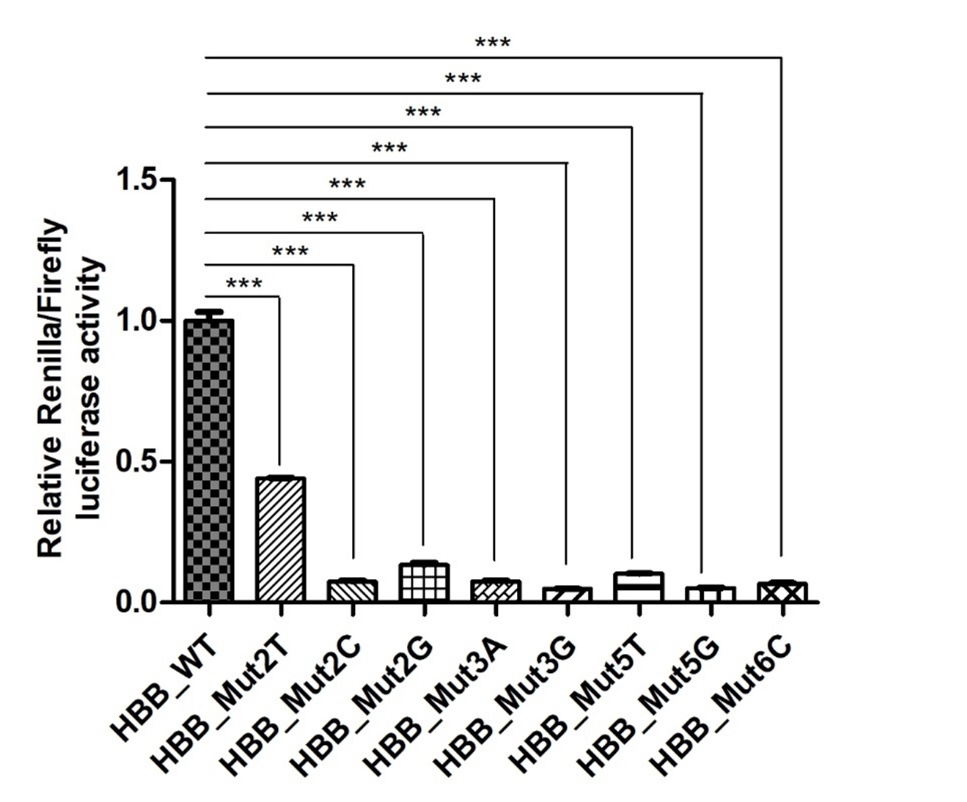


Supplemental Fig S9: Comparison of normalized *Renilla* luciferase activity in 293T cells transfected with mpCHECK2 of WT or different variants inside PAS of *HBB*. The numbers and capital letters represent the mutated position of the PAS and the bases after mutation, respectively. ***, P value < 0.001, one-way ANOVA test.
