# Supplementary material for: Systematic evaluation of the effect of polyadenylation signal variants on the expression of disease-associated genes
Source: HighWire-hosted journal article supplement (doi:10.1101/gr.270256.120), 2021-04-19
Supplement: Supplemental_Fig_10.docx [file Supplemental_Fig_10.docx]

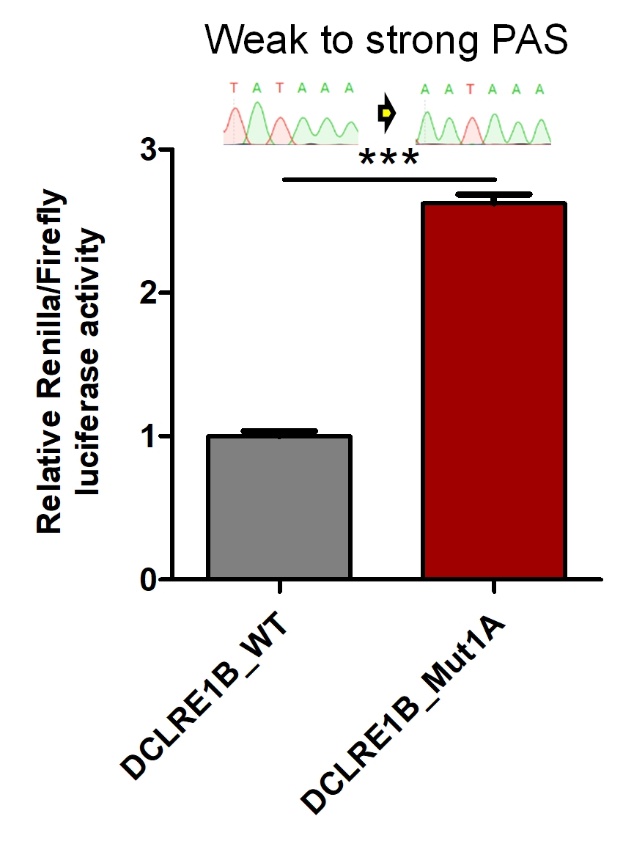


Supplemental Fig S10: Comparison of normalized *Renilla* luciferase activity in 293T cells transfected with mpCHECK2 of WT or database-annotated benign PAS variants in *DCLRE1B*. *** denotes P value < 0.001, one-way ANOVA test.
