# Supplementary material for: Systematic evaluation of the effect of polyadenylation signal variants on the expression of disease-associated genes
Source: HighWire-hosted journal article supplement (doi:10.1101/gr.270256.120), 2021-04-19
Supplement: Supplemental_Table_S1.xlsx [file Supplemental_Table_S1.xlsx]

## Sheet: Sheet1
Supplemental Table S1. The information about 68 pathogenic variants in PAS.
Gene_name	Chromosome	Strand	Position	Original_PAS	Mutated_PAS	Database	If_PAS_to_PAS	Disease	PMID	Star annotated in ClinVar database
ADAR	1	-	154561058	AATAAA	AATATA	HGMD, ClinVar	Y	Dyschromatosis symmetrica hereditaria	12916015	0
ALG11	13	+	52599008	ATTAAA	ATCAAA	HGMD, ClinVar	N	Congenital disorder of glycosylation type 1P	22213132	0
ATRX	X	-	76856021	AATAAT	AATAGT	HGMD	N	ATRX syndrome	7697714
BMP1	8	+	22058957	AGTAAA	AGCAAA	ClinVar	N	Osteogenesis imperfecta, type xiii	25214535, 15542026	0
CEP57	11	+	95555113	ATTAAA	ATTTAA	ClinVar	N	Mosaic variegated aneuploidy syndrome	https://www.ncbi.nlm.nih.gov/pubmed/28492532	1
CFTR	7	+	117199630	ATTAAA	AATAAA	HGMD	Y	Cystic fibrosis	17392794
CFTR	7	+	117199630	ATTAAA	ACTAAA	HGMD, ClinVar	Y	Cystic fibrosis	17392794	2
CFTR	7	+	117199635	AAGAAA	AACAAA	HGMD	Y	Cystic fibrosis	1284534
CFTR	7	+	117199635	AAGAAA	AATAAA	HGMD, ClinVar	Y	Cystic fibrosis	17392794	1
CHD8	14	-	21882509	ATTAAA	ATGAAA	ClinVar	N	Clinical testing	https://submit.ncbi.nlm.nih.gov/ft/byid/7oynscmk/mdi-5616_26957_genedx_interprules_final_061215.pdf	1
CRYM	16	-	21270106	AATAAA	CATAAA	HGMD, ClinVar	Y	Nonsyndromic deafness	12471561	0
CRYM	16	-	21270102	AATAAA	AATATA	HGMD, ClinVar	Y	Nonsyndromic deafness	12471561	0
CYBB	X	+	37670102	AACAAA	AATAAA	HGMD	Y	Chronic granulomatous disease	11162142
CYBB	X	+	37670099	AGTAAA	AGTTAA	HGMD	N	Chronic granulomatous disease	20729109
DCDC2	6	-	24278309	ATTAAA	ATAAAA	ClinVar	N	Sclerosing cholangitis, neonatal	27469900	0
F9	X	+	138645598	AATAAA	AATGAA	HGMD	Y	Haemophilia B	11013449
FAM111A	11	+	58920153	AACAAA	AGCAAA	HGMD	N	Osteocraniostenosis	23684011
FBN1	15	-	48725177	AATGAA	AATTAA	ClinVar	N	Clinical testing	https://submit.ncbi.nlm.nih.gov/ft/byid/7oynscmk/mdi-5616_26957_genedx_interprules_final_061215.pdf	1
FOXP3	X	-	49106919	AATAAA	AATGAA	HGMD	Y	IPEX syndrome	11685453
FOXP3	X	-	49106917	AATAAA	AATAAG	HGMD	Y	IPEX syndrome	19471859
GLA	X	-	100656751	AATAAA	AGTAAA	HGMD	Y	Fabry disease	20498269
HBA2	16	+	223691	AATAAA	AATGAA	HGMD, ClinVar	Y	Thalassaemia alpha	1581238	2
HBA2	16	+	223693	AATAAA	AATAAC	HGMD	N	Thalassaemia alpha	19912309
HBA2	16	+	223693	AATAAA	AATAAG	HGMD, ClinVar	Y	Thalassaemia alpha	6646217	1
HBB	11	-	5246720	AATAAA	GATAAA	HGMD, ClinVar	Y	Thalassaemia beta	22862814	0
HBB	11	-	5246720	AATAAA	CATAAA	HGMD	Y	Thalassaemia beta	11722440
HBB	11	-	5246718	AATAAA	AAGAAA	HGMD	Y	Thalassaemia beta	11300343
HBB	11	-	5246718	AATAAA	AACAAA	HGMD, ClinVar	Y	Thalassaemia beta	21119755, 23590658, 22690826, 22335963, 4018033	2
HBB	11	-	5246718	AATAAA	AAAAAA	HGMD, ClinVar	N	Thalassaemia beta	15481893	0
HBB	11	-	5246717	AATAAA	AATGAA	HGMD, ClinVar	Y	Thalassaemia beta	6646217, 3024968, 1856830, 26418075, 26956563, 2375910	2
HBB	11	-	5246716	AATAAA	AATATA	HGMD	Y	Thalassaemia beta	15820953
HBB	11	-	5246716	AATAAA	AATAGA	HGMD, ClinVar	Y	Thalassaemia beta	2375910	0
HBB	11	-	5246715	AATAAA	AATAAG	HGMD	Y	Thalassaemia beta	3048433, 20113284, 20437613, 12709369, 1986379, 9140720
HBB	11	-	5246796	ATTAAA	ATTAAC	HGMD, ClinVar	N	Thalassaemia beta	20181291	0
HBD	11	-	5254085	AATAAA	AATTAA	HGMD	N	Thalassaemia delta	20854114
IDS	X	-	148564476	TATAAA	TAGAAA	HGMD	N	Mucopolysaccharidosis II	7981716
IDS	X	-	148564476	TATAAA	TAAAAA	HGMD	N	Mucopolysaccharidosis II	9875019
IL2RG	X	-	70327278	AATAAA	AATAAG	HGMD	Y	Immunodeficiency, severe combined	19841577
LDHA	11	+	18425312	GATAAA	GATGAA	HGMD	N	Lactate dehydrogenase deficiency	7908613
LRP6	12	-	12397399	AACAAA	AACAAT	HGMD	N	Coronary artery disease	24427284
MARVELD2	5	+	68737445	GATAAA	GAAAAA	HGMD	N	Deafness	23967202
MLC1	22	-	50518348	AATAAA	AATAAG	HGMD	Y	Megalencephalic leukoencephalopathy with subcortical cysts 1	11935341
MMAA	4	+	146560688	AACAAG	AATAAG	HGMD, ClinVar	Y	Methylmalonic aciduria cblA type	15781192	0
MSH2	2	+	47710075	AATAAA	AATAAC	HGMD	N	Colorectal cancer, non-polyposis	15046096
MSH6	2	+	48028246	GATAAA	GATTAA	ClinVar	N	Hereditary cancer-predisposing syndrome	https://submit.ncbi.nlm.nih.gov/ft/byid/hnzcxobl/ad_xl_classificationscheme_03.2017_ambry.pdf	1
MSH6	2	+	48028254	ATTACA	ATTAAA	ClinVar	Y		https://submit.ncbi.nlm.nih.gov/ft/byid/TbQpmFtg/PHGTv1.pdf	1
MSH6	2	+	48028254	ATTACA	ATTAGA	ClinVar	N	Hereditary cancer-predisposing syndrome	https://www.ncbi.nlm.nih.gov/pubmed/25741868	1
NCSTN	1	+	160326518	AGTAAA	GGTAAA	HGMD	N	Hidradenitis suppurativa	22358060
NPC2	14	-	74951148	AATAAA	AAGAAA	HGMD	Y	Niemann-Pick type C2 disease	18081003
OFD1	X	+	13786230	AATGAA	AATTAA	ClinVar	N	Joubert syndrome;Primary ciliary dyskinesia		0
OPA1	3	+	193409916	AATAAA	AATACA	HGMD	Y	Optic atrophy 1	16617242
PHEX	X	+	22266301	AACAAA	AACGAA	HGMD	N	Rickets, hypophosphataemic	18625346
PSMD12	17	-	65337056	ATTAAA	ATGAAA	ClinVar	N	Stankiewicz-Isidor syndrome	28132691	0
PTS	11	+	112104222	TATAAA	AATAAA	HGMD	Y	6-pyruvoyl-tetrahydropterin synthase deficiency	22237589
PTS	11	+	112104225	TATAAA	TATGAA	HGMD	N	Hyperphenylalaninaemia	9222757
RAB18	10	+	27826978	TATAAA	TACAAA	ClinVar	N	Warburg micro syndrome 3	21473985, 29300443	0
RAB18	10	+	27826978	TATAAA	TAGAAA	HGMD	N	Warburg Micro syndrome	21473985
RAB33B	4	+	140394034	AATAAA	AAAAAA	HGMD, ClinVar	N	Smith-McCort dysplasia 2	23042644, 16470731	0
RAD50	5	+	131978056	ATTAAA	ATTATA	HGMD	Y	Nijmegen breakage syndrome-like disorder	19409520
RPL5	1	+	93299160	AATACA	AATAGA	ClinVar	Y	Diamond-Blackfan anemia	28492532	1
SACS	13	-	23932558	AAGAAA	AATAAA	HGMD	Y	Cerebellar ataxia	22287014
SERPINC1	1	-	173873028	AGTAAA	AGTCAA	HGMD	N	Antithrombin deficiency	22398878
SOD1	21	+	33040827	AAGAAA	AAGTAA	HGMD	N	Amyotrophic lateral sclerosis	23280792
SOD1	21	+	33040829	AAGAAA	AAGAAG	HGMD	N	Amyotrophic lateral sclerosis	22773853
SPATA17	14	+	88903921	AACAAA	AATAAA	ClinVar	Y	Leber congenital amaurosis	https://www.ncbi.nlm.nih.gov/pubmed/28492532	1
TARDBP	1	+	11082266	AATAGA	AGTAGA	HGMD, ClinVar	N	Amyotrophic lateral sclerosis	19224587	0
TPM1	15	+	63354814	ACTAAA	ACTGAA	HGMD, ClinVar	N	left ventricular noncompaction cardiomyopathy	21551322	0
TPRKB	2	-	73957152	TATAAA	TGTAAA	ClinVar	N	Galloway-Mowat syndrome	28805828	0
