# Supplementary material for: Systematic evaluation of the effect of polyadenylation signal variants on the expression of disease-associated genes
Source: HighWire-hosted journal article supplement (doi:10.1101/gr.270256.120), 2021-04-19
Supplement: Supplemental_Table_S2.xlsx [file Supplemental_Table_S2.xlsx]

## Sheet: Sheet1
Supplemental Table S2. The information about GWAS catalog variants in PAS
Gene	Chromosome	Strand	Position	Original_PAS	SNP	Alleles in dbSNP	Phenotype in GWAS Catalog
ANKIB1	7	+	92029302	AGTAAA	rs12740	G>A,C	Red blood cell count
APOB	2	-	21247065	ATTAAA	rs57825321	T>A	Low density lipoprotein cholesterol levels; Total cholesterol levels
APOC1	19	+	45422587	AATAAA	rs12721054	A>G	Total cholesterol levels; Triglycerides; Low density lipoprotein cholesterol levels; Triglyceride levels
ARID5B	10	+	63785089	AAGAAA	rs10821944	G>T	Rheumatoid arthritis; Blood urea nitrogen levels; Estimated glomerular filtration rate
CCDC153	11	-	119060963	AATAGA	rs45535039	T>C,G	Plateletcrit
CCDC71L	7	-	106299792	ATTAAA	rs2286149	T>A,C,G	Waist-hip ratio
CELF1	11	-	47488115	AAGAAA	rs555328608	delT / dupT / dupTT	Total cholesterol levels
CHDH	3	-	53850005	AAGAAA	rs11130381	C>T	Cardiovascular disease
CTSC	11	-	88053979	AATATA	rs217053	T>C	Neurological blood protein biomarker levels
DDA1	19	+	17434093	ATTAAA	rs77331626	T>A	Rheumatoid arthritis
DIP2B	12	+	51138862	ACTAAA	rs1047912	C>T	Lung function (FVC); Red cell distribution width
FBLN2	3	+	13679855	TATAAA	rs7596	T>A,C	Appendicular lean mass
FBXO31	16	-	87364650	AATACA	rs1062746	T>C	Response to anti-retroviral therapy (ddI/d4T) in HIV-1 infection (Grade 2 peripheral neuropathy)
HCN1	5	-	45259363	AACAAA	rs12522910	T>C	Age at first sexual intercourse
IGFLR1	19	-	36230174	AATAAA	rs12459634	T>C	Blood protein levels
IRF5	7	+	128589427	AATGAA	rs10954213	G>A	Sjögren's syndrome
JAM2	21	+	27087044	TATAAA	rs2829877	T>C	Age at loss of ambulation in Duchenne muscular dystrophy
JAM2	21	+	27087044	ATTATA	rs2829877	T>C	Age at loss of ambulation in Duchenne muscular dystrophy
KDELR2	7	-	6502367	ATTATA	rs6796	T>C	Granulocyte percentage of myeloid white cells; Mean platelet volume; Monocyte count; Monocyte percentage of white cells; Attention deficit hyperactivity disorder (inattention symptoms); Lymphocyte counts
KLF2	19	+	16438661	AATAAA	rs11086029	T>A	Multiple myeloma
LTBP2	14	-	74964903	AATAAA	rs74384554	T>C	Intraocular pressure
MRPL19	2	+	75882855	AATAAG	rs3732304	A>C,G,T	Core binding factor acute myeloid leukemia
NCR3	6	-	31556709	AATAAA	rs986475	A>G,T	Blood protein levels
OSTM1	6	-	108364582	AATATA	rs12567	T>C	Major depressive disorder
PBX2	6	-	32153341	TATAAA	rs201026476	delAA / delA / dupA	Rheumatic heart disease
POU2F1	1	+	167395475	ATTAAA	rs552304070	delAAA / delAA / delA / dupA	Pre-treatment viral load in HIV-1 infection
RALB	2	+	121052268	AATAAA	rs1137385	A>T	Platelet count
RTF1	15	+	41774423	GATAAA	rs1942	A>C,G,T	Asthma; Eosinophil percentage of granulocytes
SEL1L	14	-	81942929	ACTAAA	rs17094188	G>C	Lymphocyte counts
SLC50A1	1	+	155111307	AATAAA	rs71628645	A>G	Red blood cell count
SRGAP1	12	+	64540960	ATTAAA	rs7131691	A>G,T	Highest math class taken (MTAG)
TNFRSF11A	18	+	60054857	ATTAAA	rs884205	A>C,T	Heel bone mineral density; Total body bone mineral density; Total body bone mineral density (age 45-60); Serum alkaline phosphatase levels; Femoral neck bone mineral density; Lumbar spine bone mineral density; Blood protein levels; Bone mineral density (spine); Bone mineral density (paediatric, skull)
TP53	17	-	7571752	AATAAA	rs78378222	T>G	Basal cell carcinoma; Diastolic blood pressure; Pulse pressure; Mean corpuscular hemoglobin; Glioblastoma; Glioma; Non-glioblastoma glioma; Cancer; Mosaic loss of chromosome Y (Y chromosome dosage); Non-melanoma skin cancer; Glioblastoma (age-stratified); Uterine fibroids; Fat-free mass; Red blood cell count; White blood cell count; Birth weight; Keratinocyte cancer (MTAG); Uterine fibroids and h…
TRDMT1	10	-	17188641	AGTAAA	rs10904887	T>A,C	Telomere length
UROC1	3	-	126200146	AATAAA	rs777513	A>T	Age at menopause
