# Supplementary material for: Systematic evaluation of the effect of polyadenylation signal variants on the expression of disease-associated genes
Source: HighWire-hosted journal article supplement (doi:10.1101/gr.270256.120), 2021-04-19
Supplement: Supplemental_Table_S3.xlsx [file Supplemental_Table_S3.xlsx]

## Sheet: S2
Supplemental Table S3. Primer information for semi-quantitative RT-PCR and qRT-PCR.
Primer label	Forward primer (from 5′ to 3′)	Reverse primer (from 5′ to 3′)	TM
qRT-PCR primer of HBA2	GTACATCAAGAGCTTCGTGG	ATTCAAAGACCAGGAAGGGC	60℃
qRT-PCR primer of HBB	GTACATCAAGAGCTTCGTGG	GCAGAATCCAGATGCTCAAG	60℃
Semi-quantitative RT-PCR primer of HBA2	GTACATCAAGAGCTTCGTGG	ATTCAAAGACCAGGAAGGGC	63℃
Semi-quantitative RT-PCR primer of HBB	GTACATCAAGAGCTTCGTGG	GCAGAATCCAGATGCTCAAG	63℃
