# Supplementary figures and images for: Systematic evaluation of the effect of polyadenylation signal variants on the expression of disease-associated genes
Source: HighWire-hosted journal article supplement (doi:10.1101/gr.270256.120), 2021-04-19

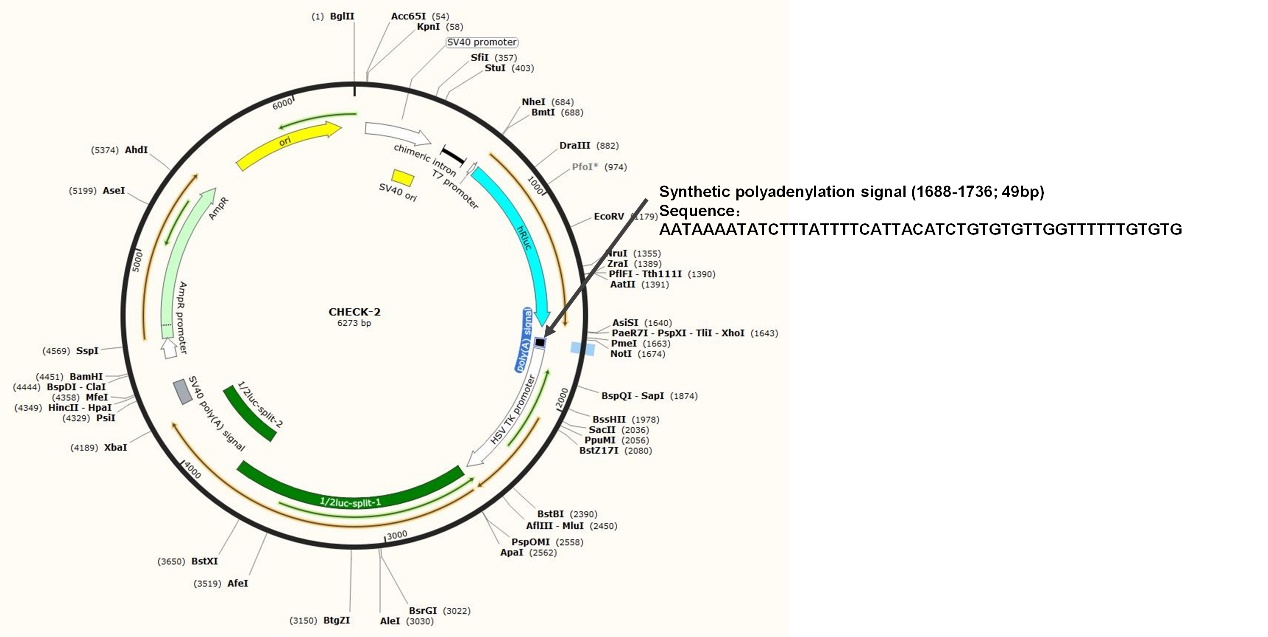


Supplemental Fig S1: The sequence and position of synthetic PAS in the original psiCHECK2 vector.

Supplement: Supplemental_Fig_1.docx [file Supplemental_Fig_1.docx]

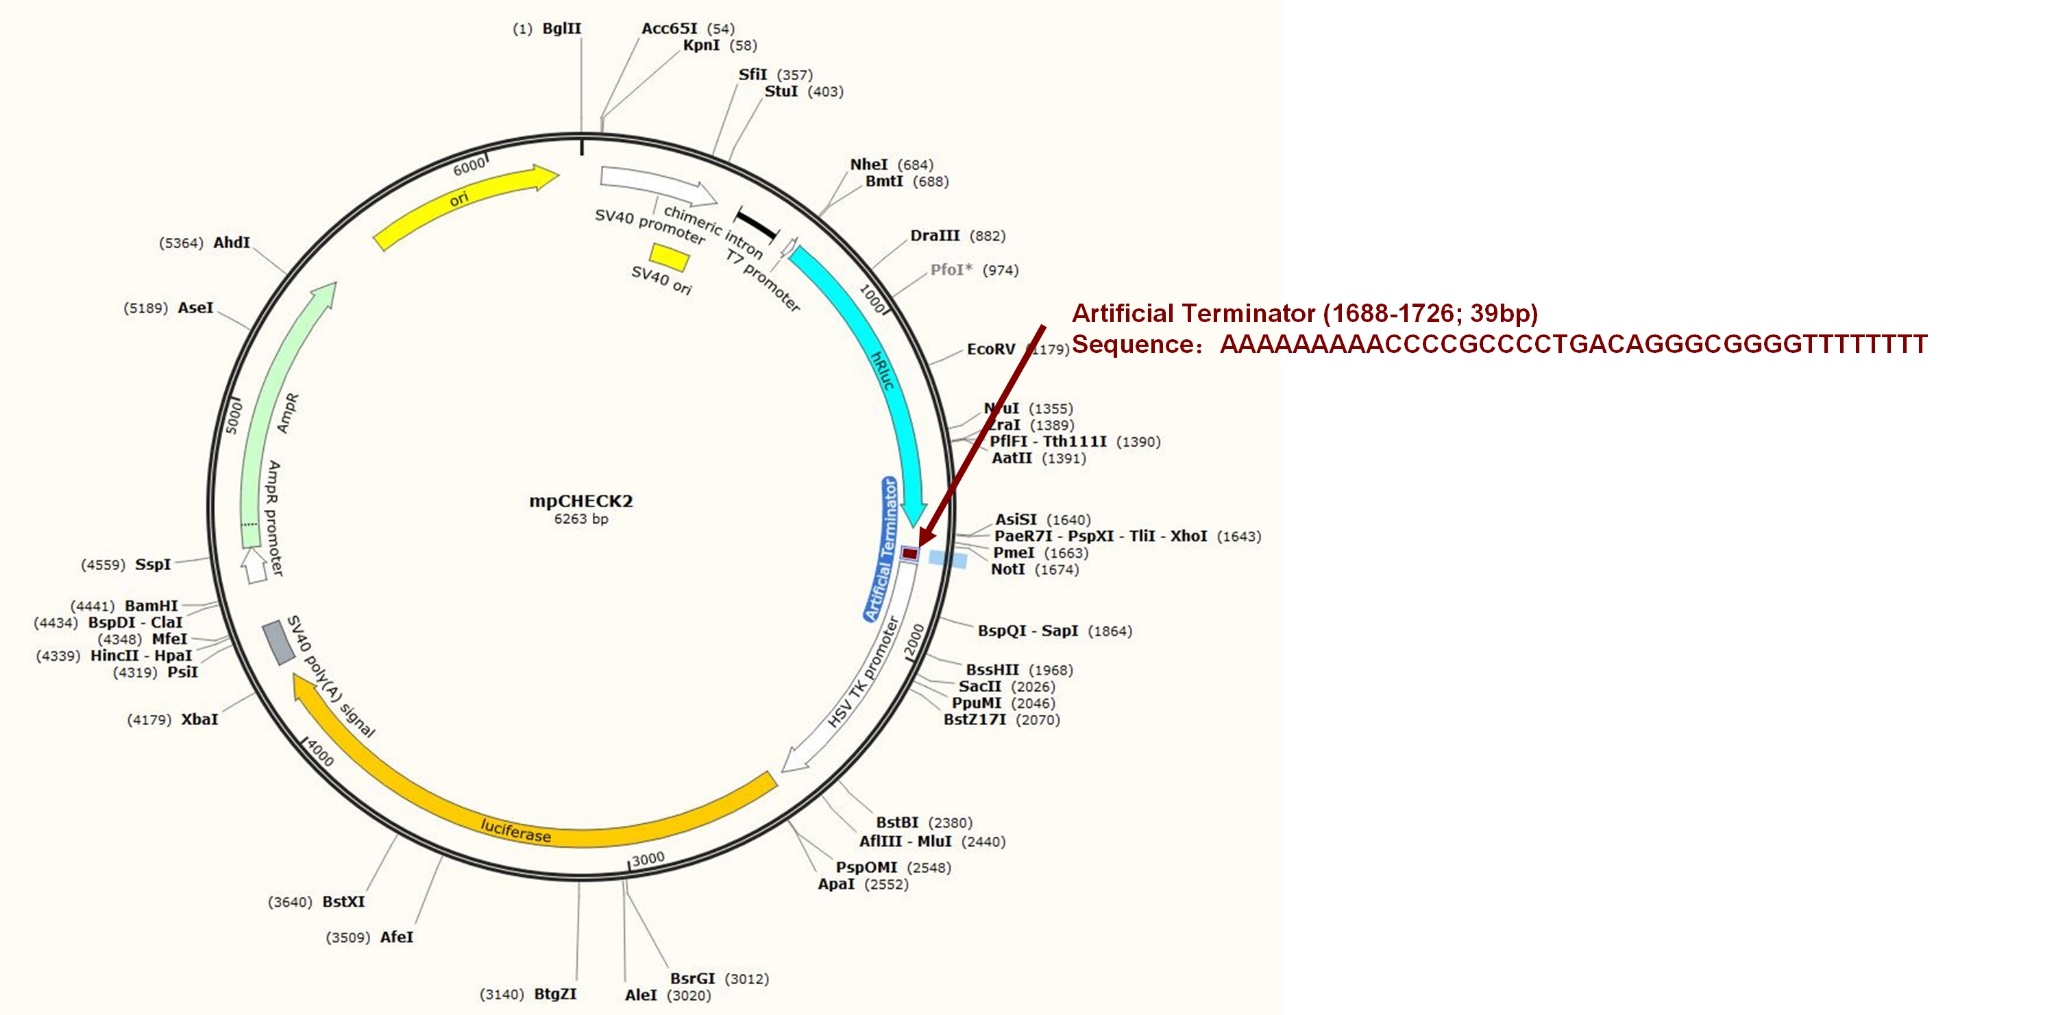


Supplemental Fig S2: The sequence and position of artificial terminator in the mpCHECK2 vector.

Supplement: Supplemental_Fig_2.docx [file Supplemental_Fig_2.docx]
